# Supplementary material for: Several carbon-coated Ga2O3 anodes: efficient coating of reduced graphene oxide enhanced the electrochemical performance of lithium ion batteries
Source: Royal Society of Chemistry journal article supplement (doi:10.1039/d0dt04009f), 2021-01-01
Supplement: d0dt04009f1.pdf [file d0dt04009f1.pdf]

**Supporting for**  
**Several carbon-coated Ga<sub>2</sub>O<sub>3</sub> anodes: Efficient coating of reduced**  
**Graphene Oxide enhanced electrochemical performance for lithium**  
**ion batteries**

Ke Wang\*, Wenkai Ye, Weihao Yin, Wenwen Chai, Yichuan Rui and Bohejin Tang<sup>#</sup>

College of Chemistry and Chemical Engineering, Shanghai University of Engineering  
Science, Shanghai 201620, PR China

<sup>#</sup>Corresponding author: tangbohejin@sues.edu.cn

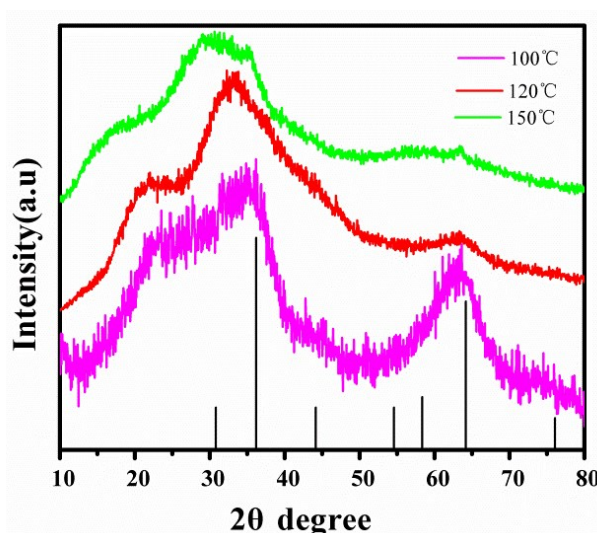

Fig.S1 The XRD pattern of Ga<sub>2</sub>O<sub>3</sub> at 100 °C, 120 °C and 150 °C

The XRD pattern of Ga<sub>2</sub>O<sub>3</sub> at different temperature was shown in Fig.S1. It can be observed that the XRD pattern of Ga<sub>2</sub>O<sub>3</sub> in 100 °C was indexed to the space group (JCPDS#20-0426), which corresponded to the face-centered cubic structure of γ-Ga<sub>2</sub>O<sub>3</sub>. It is worth noting that with the increase of temperature, the diffraction peak of Ga<sub>2</sub>O<sub>3</sub> will shift slightly, but the XRD diffraction peak at 64° of Ga<sub>2</sub>O<sub>3</sub> in 120 and 150 °C was still assigned to the Ga<sub>2</sub>O<sub>3</sub> (JCPDS#20-0426).

The average particle diameters (*d*) were calculated based on the peak broadening of the

(311) reflection of  $\gamma$ -Ga<sub>2</sub>O<sub>3</sub> in 100°C by using the Scherrer formula:  $D = \frac{0.89\gamma}{\beta \cos\theta}$ ,

$$\beta = \frac{X1 - X2}{180} * \pi = 0.0488, \gamma = 0.15405, D = 3.87nm$$

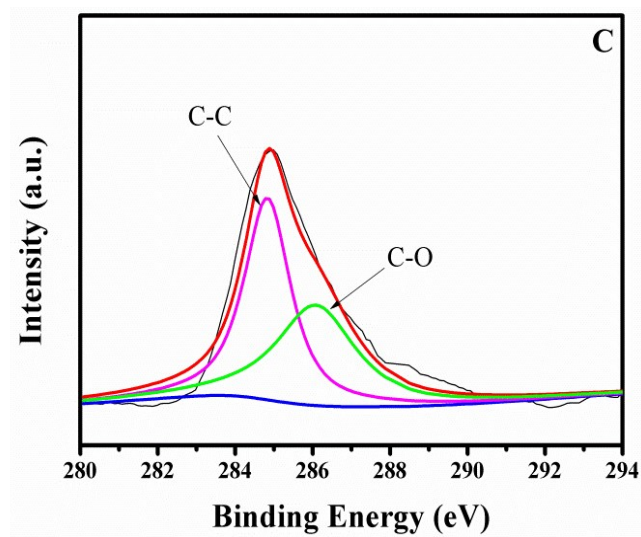

Fig.S2 High-resolution XPS spectrum of C1s.

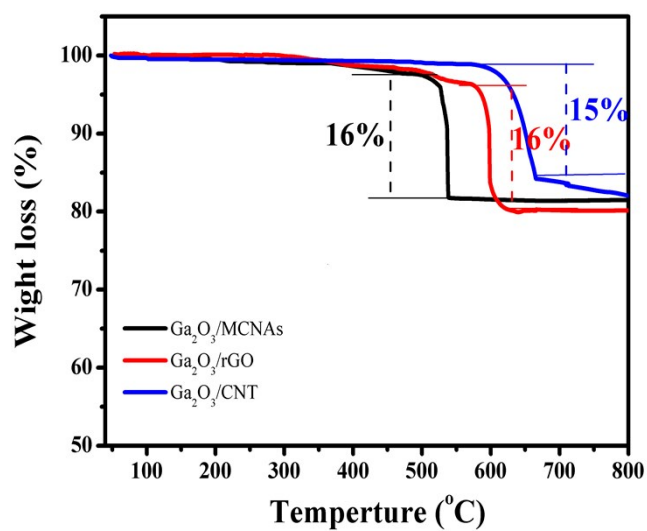

Fig.S3 The TG curves of Ga<sub>2</sub>O<sub>3</sub>/MCNAs(black line), Ga<sub>2</sub>O<sub>3</sub>/rGO(red line) ,and Ga<sub>2</sub>O<sub>3</sub>/CNT(blue line)

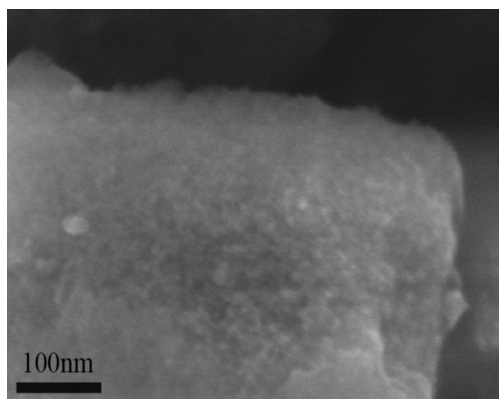

Fig.S4 The SEM image of Ga<sub>2</sub>O<sub>3</sub> nanoparticles

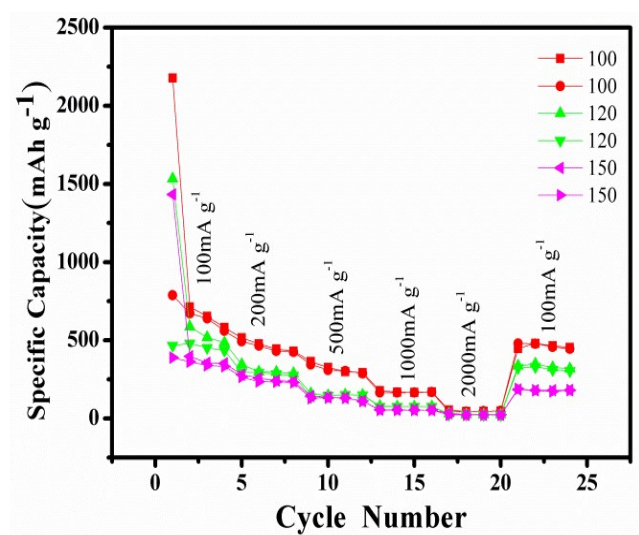

Fig.S5 Rate performance of Ga<sub>2</sub>O<sub>3</sub> at three temperatures

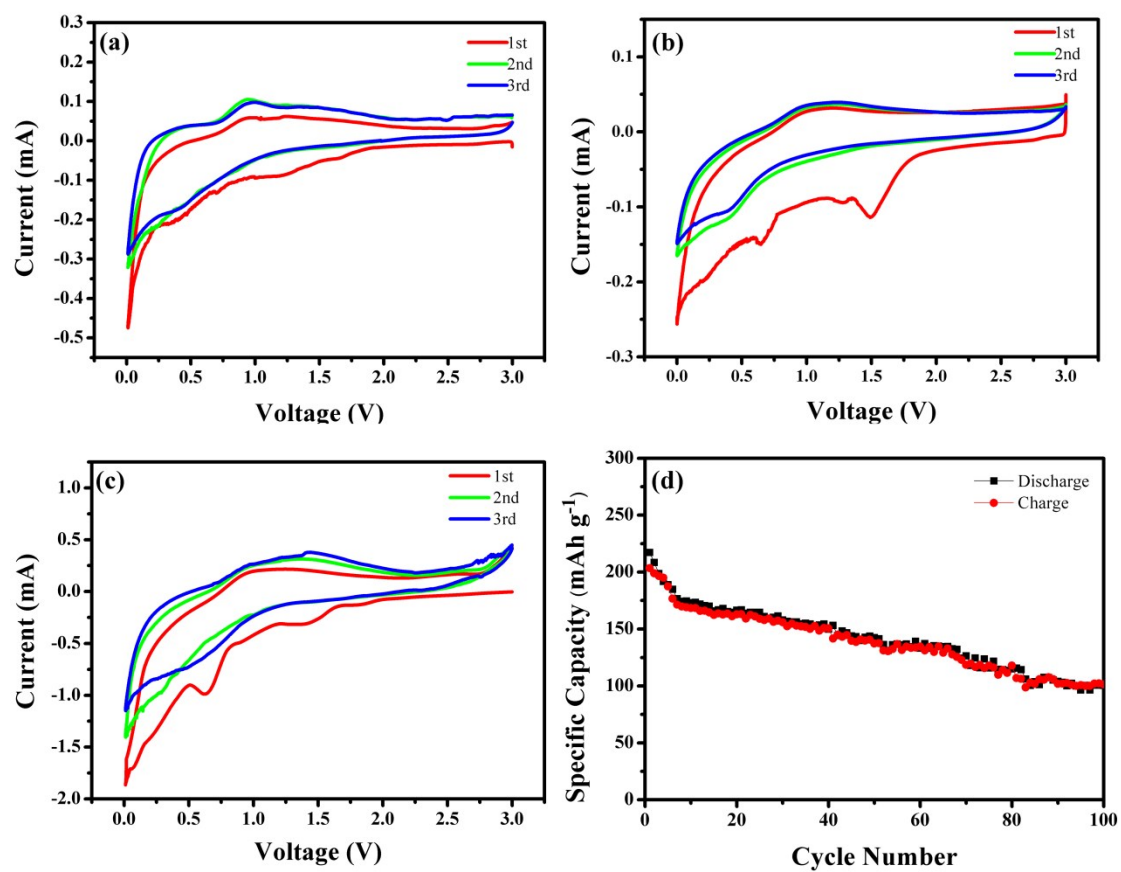

Fig. S6 CV curves of the first three cycles of  $\text{Ga}_2\text{O}_3/\text{MCNAs}$ (a),  $\text{Ga}_2\text{O}_3/\text{CNT}$ (b) and  $\text{Ga}_2\text{O}_3$ (c) electrodes. (d) Cycling performance of the  $\text{Ga}_2\text{O}_3$  electrodes at the current density of  $1000 \text{ mAh g}^{-1}$

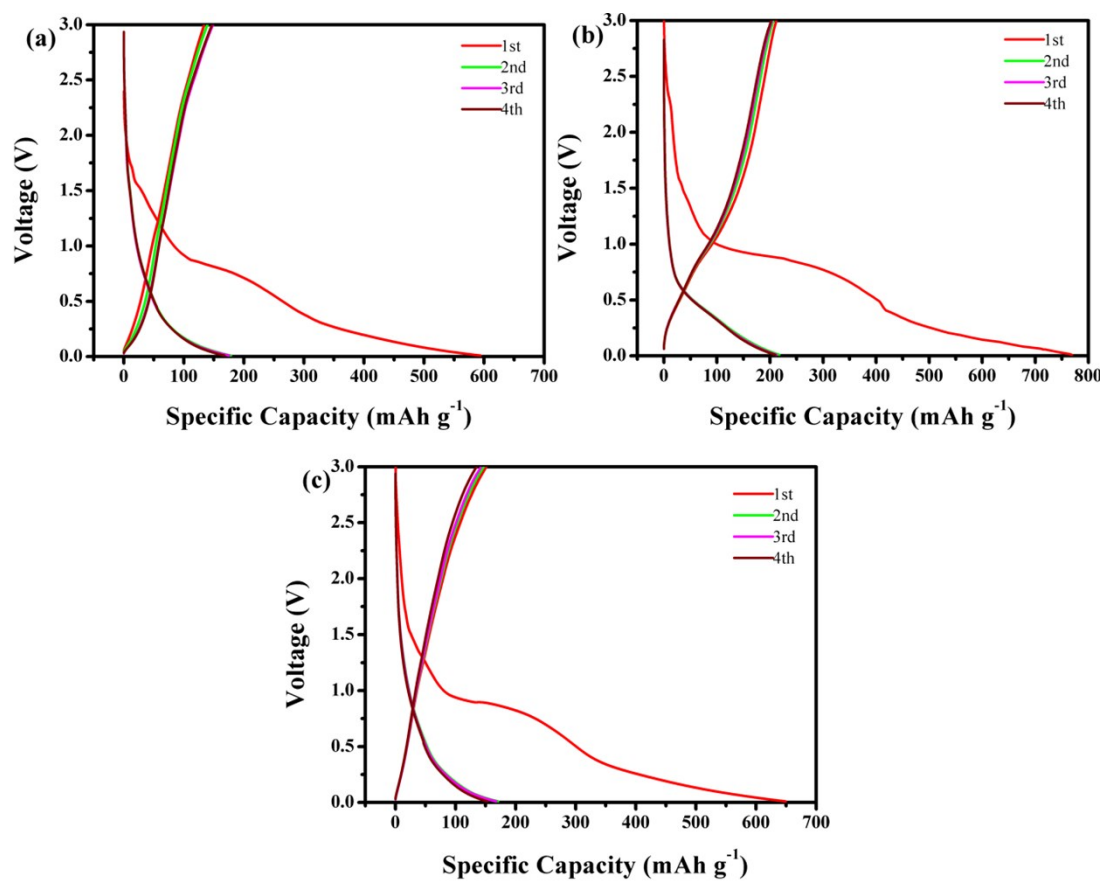

Fig. S7 the galvanostatic charge/discharge curves at 100 mA  $g^{-1}$  of rGO (a), MCNAs (b), and CNT(c) electrodes.

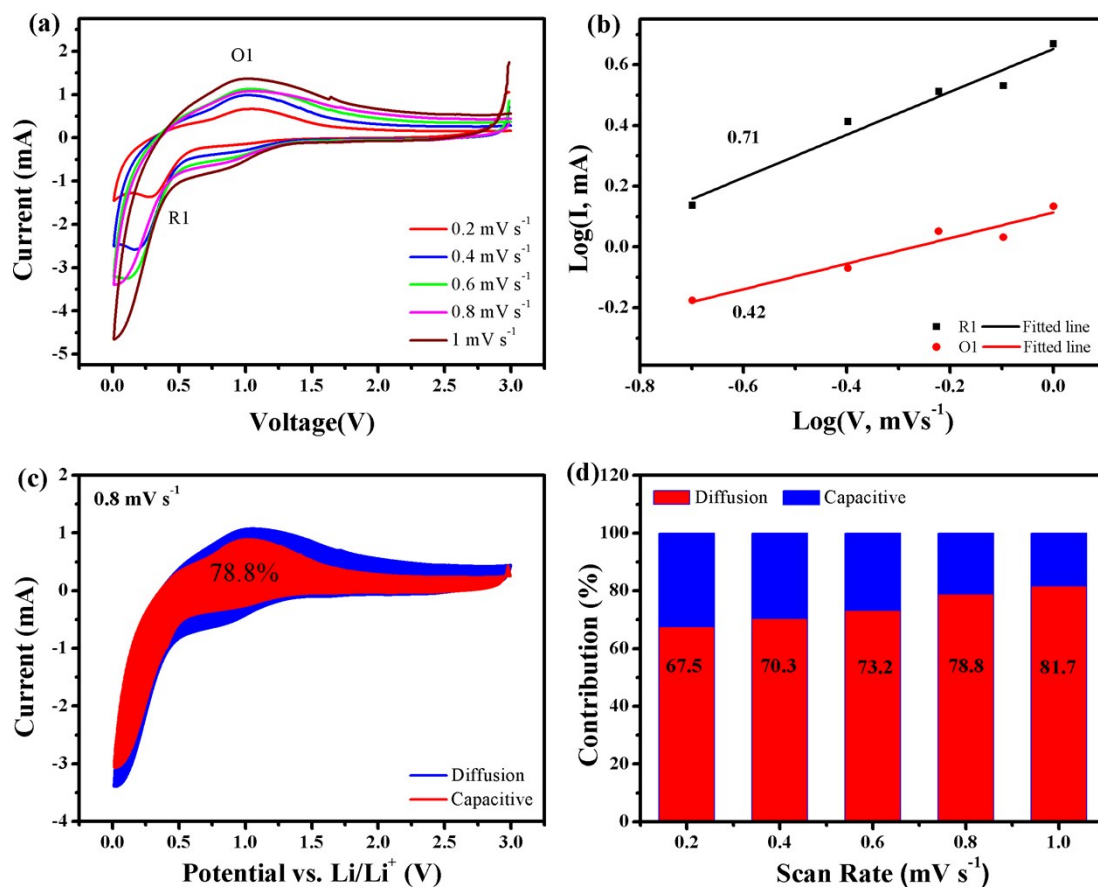

Fig. S8 (a) CV curves at different scan rates ranging from 0.01 V to 3.00 V, (b) relationship of  $\text{Log } i$  vs.  $\text{Log } v$  at oxidation and reduction states, (c) capacitive and diffusion contribution to charge storage at 0.6  $\text{mV s}^{-1}$ , (d) contribution ratio of the capacitive and diffusion controlled capacities at different scan rates of  $\text{Ga}_2\text{O}_3$

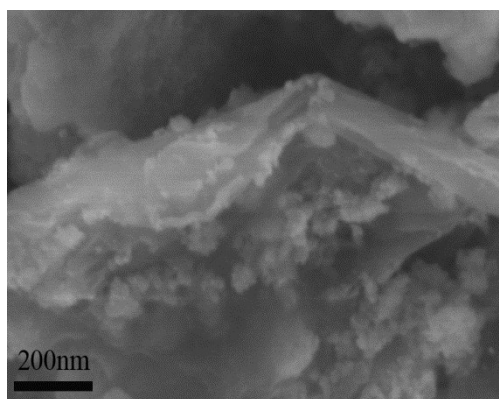

Fig. S9 The SEM image of the  $\text{Ga}_2\text{O}_3/\text{rGO}$  electrode after cycling test.

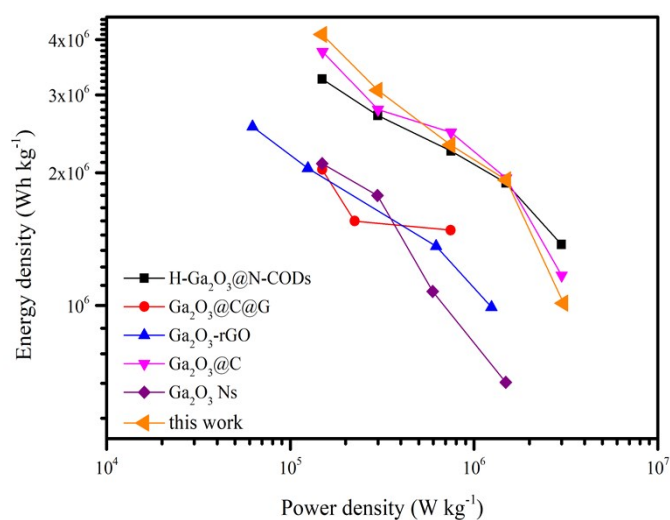

Fig. S10 Ragone plots of different  $\text{Ga}_2\text{O}_3$  composite materials.

Table.S1 The  $\text{N}_2$  adsorption-desorption test results of  $\text{Ga}_2\text{O}_3/\text{C}$  and three types of carbon materials.

| samples                              | specific surface area<br>( $\text{m}^2 \text{g}^{-1}$ ) | pore volume<br>( $\text{cm}^3 \text{g}^{-1}$ ) | pore size<br>(nm) |
|--------------------------------------|---------------------------------------------------------|------------------------------------------------|-------------------|
| $\text{Ga}_2\text{O}_3/\text{rGO}$   | 253                                                     | 0.18                                           | 2.8               |
| $\text{Ga}_2\text{O}_3/\text{MCNAs}$ | 307                                                     | 0.24                                           | 3.4               |
| $\text{Ga}_2\text{O}_3/\text{CNT}$   | 293                                                     | 0.23                                           | 3.1               |
| rGO                                  | 167                                                     | 0.16                                           | 2.4               |
| MCNAs                                | 1290                                                    | 1.59                                           | 4.2               |
| CNT                                  | 187                                                     | 0.97                                           | 3.7               |

## References

1. J. Guo, F. Gao, D. Li, X. Luo and S. Li, *ACS Sustainable Chemistry & Engineering*, 2020, **XXXX**.
2. S. Ni, Q. Chen, J. Liu, S. Yang, T. Li, X. Yang and J. Zhao, *Journal of Power Sources*, 2019, **433**, 126681.
3. S. B. Patil, I. Y. Kim, J. L. Gunjekar, S. M. Oh, T. Eom, H. Kim and S. J. Hwang, *ACS Appl Mater Interfaces*, 2015, **7**, 18679-18688.
4. X. Tang, X. Huang, Y. Huang, Y. Gou, J. Pastore, Y. Yang, Y. Xiong, J. Qian, J. D. Brock, J. Lu, L. Xiao, H. D. Abruna and L. Zhuang, *ACS Appl Mater*

*Interfaces*, 2018, **10**, 5519-5526.

5. G. Meligrana, W. Lueangchaichaweng, F. Colò, M. Destro, S. Fiorilli, P. P. Pescarmona and C. Gerbaldi, *Electrochimica Acta*, 2017, **235**, 143-149.
